# Supplementary material
Source: Springer Nature journal article supplement (https://www.springermedizin.de/resource/supplementary/12957_2013_1417_MOESM4_ESM.pdf/9562534)
Supplement: MOESM4 [file 9562534]

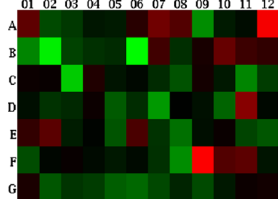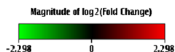

| Layout   | 01             | 02              | 03              | 04               | 05              | 06             | 07             | 08                | 09            | 10               | 11               | 12              |
|----------|----------------|-----------------|-----------------|------------------|-----------------|----------------|----------------|-------------------|---------------|------------------|------------------|-----------------|
| <b>A</b> | AKT1<br>1.79   | ANGPT1<br>-1.59 | ANGPT2<br>-1.43 | ANGPTL3<br>-1.15 | ANPTL4<br>-1.18 | ANPEP<br>1.29  | BAI1<br>2.00   | CCL11<br>1.67     | CCL2<br>-2.44 | CDH5<br>-1.18    | COL18A1<br>-1.07 | COL4A3<br>4.65  |
| <b>B</b> | CXCL1<br>-2.32 | CXCL10<br>-4.49 | CXCL3<br>-1.50  | CXCL5<br>-1.35   | CXCL6<br>-1.30  | CXCL9<br>-4.86 | TYMP<br>1.49   | SIPR1<br>-1.34    | EFNA1<br>1.16 | EFNA3<br>1.90    | EFNB2<br>1.46    | EGF<br>1.36     |
| <b>C</b> | ENG<br>1.07    | EPHB4<br>1.05   | EREG<br>-3.56   | FGF1<br>1.22     | FGF2<br>-1.14   | FGFR3<br>-1.05 | FIGF<br>-1.30  | FLT1<br>-1.68     | HAND2<br>1.13 | HGF<br>-1.17     | HIF1A<br>-2.30   | HPSE<br>-1.45   |
| <b>D</b> | ID1<br>-1.09   | ID3<br>-1.37    | IFNA1<br>-1.29  | IFNB1<br>1.08    | IFNG<br>-1.75   | IGF1<br>-1.31  | IL1B<br>-2.61  | IL6<br>-1.01      | IL8<br>-1.11  | ITGAV<br>-1.88   | ITGB3<br>2.33    | JAG1<br>-1.05   |
| <b>E</b> | KDR<br>1.36    | LAMA5<br>1.76   | LECT1<br>-1.20  | LEP<br>-1.02     | MDK<br>-1.68    | MMP2<br>1.60   | MMP9<br>-1.37  | NOTCH4<br>-2.00   | NRP1<br>-1.09 | NRP2<br>1.07     | PDGFA<br>-1.53   | PECAM1<br>-1.72 |
| <b>F</b> | PF4<br>-1.61   | PGF<br>-1.04    | PLAU<br>1.05    | PLG<br>-1.06     | PLXDC1<br>-1.16 | PROK2<br>-1.06 | PTGS1<br>-1.35 | SERPINF1<br>-2.43 | SPHK1<br>4.92 | STAB1<br>1.68    | TEX<br>1.77      | TGFA<br>-1.13   |
| <b>G</b> | TGFB1<br>1.18  | TGFB2<br>-1.71  | TGFB3<br>-1.38  | THBS1<br>-1.46   | THBS2<br>-1.80  | TIMP1<br>-1.91 | TIMP2<br>-1.57 | TIMP3<br>-1.26    | TNF<br>-1.58  | TNFAIP2<br>-1.17 | VEGFA<br>1.07    | VEGFC<br>1.12   |

Group 1 vs. Control Group

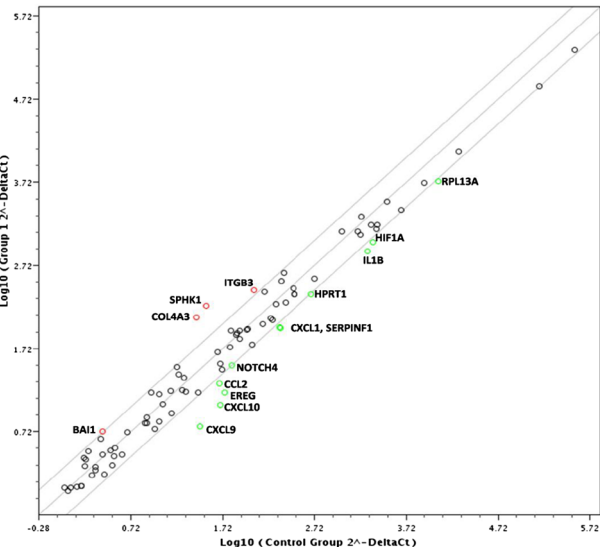

| Gene symbol                 | Description                                                                                            | Fold-regulation |
|-----------------------------|--------------------------------------------------------------------------------------------------------|-----------------|
| <b>GENES UP-REGULATED</b>   |                                                                                                        |                 |
| SPHK1                       | Sphingosine kinase 1                                                                                   | 4.9189          |
| COL4A3                      | Collagen, type IV, alpha 3 (Goodpasture antigen)                                                       | 4.6536          |
| BAI1                        | Brain-specific angiogenesis inhibitor 1                                                                | 2.0023          |
| ITGB3                       | Integrin, beta 3 (platelet glycoprotein IIIa, antigen CD61)                                            | 2.3349          |
| <b>GENES DOWN-REGULATED</b> |                                                                                                        |                 |
| EREG                        | Epiregulin                                                                                             | -3.5595         |
| SERPINF1                    | Serpin peptidase inhibitor, clade F (alpha-2 antiplasmin, pigment epithelium derived factor), member 1 | -2.4256         |
| CXCL9                       | Chemokine (C-X-C motif) ligand 9                                                                       | -4.8568         |
| CXCL10                      | Chemokine (C-X-C motif) ligand 10                                                                      | -4.4898         |
| IL1B                        | Interleukin 1, beta                                                                                    | -2.6147         |
| CCL2                        | Chemokine (C-C motif) ligand 2                                                                         | -2.4425         |
| CXCL1                       | Chemokine (C-X-C motif) ligand 1 (melanoma growth stimulating activity, alpha)                         | -2.3161         |
| HIF1A                       | Hypoxia inducible factor 1, alpha subunit (basic helix-loop-helix transcription factor)                | -2.3001         |
| NOTCH4                      | Notch 4                                                                                                | -2.0023         |
